# Supplementary material for: Impact of centralization of prostate cancer services on the choice of radical treatment
Source: PubMed Central journal article supplement (PMC10084068; doi:10.1111/bju.15830), 2022-07-08
Supplement: BJU-131-53-s001.pdf [file BJU-131-53-s001.pdf]

**Appendix Table 1** - Results of the univariate and multivariate analysis for patients aged 75 and under, assessing the impact of patient characteristics and the relative proximity of radiotherapy and surgical services to a patient's residence on the choice of treatment modality.

|                                                                                   | Proportion of men treated with radiotherapy | Proportion of men treated with radical prostatectomy | Unadjusted odd ratios for receipt of radiotherapy |                 | Adjusted odds ratio for receipt of radiotherapy |        |
|-----------------------------------------------------------------------------------|---------------------------------------------|------------------------------------------------------|---------------------------------------------------|-----------------|-------------------------------------------------|--------|
|                                                                                   |                                             |                                                      | <b>95% CI</b>                                     | <b>P values</b> |                                                 |        |
| <b>Treatment options available at nearest centre</b>                              |                                             |                                                      |                                                   | <0.001          |                                                 | <0.001 |
| Both RT and RP                                                                    | 57.3%                                       | 42.7%                                                | reference                                         |                 | reference                                       | 1      |
| Only RT available and nearest centre offering RP >15 mins extra travel time away  | 62.8%                                       | 37.2%                                                | <b>1.28 (1.14-1.44)</b>                           |                 | <b>1.24 (1.09-1.41)</b>                         |        |
| Only RT available and nearest centre offering RP <15 mins extra travel time away  | 55.3%                                       | 44.7%                                                | <b>0.89 (0.82-0.97)</b>                           |                 | <b>0.89 (0.81-0.97)</b>                         |        |
| Only RP available and nearest centre offering RT < 15 mins extra travel time away | 54%                                         | 46%                                                  | <b>0.90 (0.82-0.98)</b>                           |                 | 0.94 (0.85-1.03)                                |        |
| Only RP available and nearest centre offering RT >15 mins extra travel time away  | 52%                                         | 48%                                                  | <b>0.78 (0.65-0.92)</b>                           |                 | <b>0.70 (0.58-0.85)</b>                         |        |
|                                                                                   |                                             |                                                      |                                                   |                 |                                                 |        |
| <b>Age (Years)</b>                                                                |                                             |                                                      |                                                   | <0.001          |                                                 | <0.001 |
| <60                                                                               | 26.1%                                       | 73.9%                                                | reference                                         |                 | reference                                       | 1      |
| 60-64                                                                             | 41.1%                                       | 58.9%                                                | <b>1.98 (1.78-2.21)</b>                           |                 | <b>1.98 (1.78-2.20)</b>                         |        |
| 65-69                                                                             | 52.1                                        | 47.9%                                                | <b>3.08 (2.79-3.40)</b>                           |                 | <b>3.02 (2.74-3.34)</b>                         |        |
| 70-74                                                                             | 74.1                                        | 25.9%                                                | <b>9.48 (8.54-10.50)</b>                          |                 | <b>9.35 (8.41-10.40)</b>                        |        |
|                                                                                   |                                             |                                                      |                                                   |                 |                                                 |        |
| <b>Comorbidities (using RCS Charlson Score)</b>                                   |                                             |                                                      |                                                   | <0.001          |                                                 | <0.001 |
| 0                                                                                 | 53.5%                                       | 46.5%                                                | 1                                                 |                 | 1                                               |        |
| 1                                                                                 | 66.9%                                       | 33.1%                                                | <b>1.76 (1.61-1.94)</b>                           |                 | <b>1.59 (1.44-1.77)</b>                         |        |
| 2+                                                                                | 81.1%                                       | 18.9%                                                | <b>3.75 (3.10-4.53)</b>                           |                 | <b>3.15 (2.56-3.88)</b>                         |        |
|                                                                                   |                                             |                                                      |                                                   |                 |                                                 |        |
| <b>Deprivation status (national Quintiles)</b>                                    |                                             |                                                      |                                                   | 0.4931          |                                                 | <0.001 |
| 1 (least deprived)                                                                | 57.4%                                       | 42.6%                                                | 1                                                 |                 | 1                                               |        |
| 2                                                                                 | 57.0%                                       | 43.0%                                                | 1.01 (0.92-1.10)                                  |                 | 1.03 (0.94-1.14)                                |        |
| 3                                                                                 | 56.6%                                       | 43.4%                                                | 1.00 (0.91-1.10)                                  |                 | 1.05 (0.95-1.17)                                |        |
| 4                                                                                 | 54.6%                                       | 45.4%                                                | 0.94 (0.85-1.04)                                  |                 | 1.05 (0.94-1.18)                                |        |
| 5 (most deprived)                                                                 | 56.5%                                       | 43.5%                                                | 1.04 (0.93-1.16)                                  |                 | <b>1.19 (1.20-1.52)</b>                         |        |
|                                                                                   |                                             |                                                      |                                                   |                 |                                                 |        |
| <b>Ethnicity</b>                                                                  |                                             |                                                      |                                                   | <0.001          |                                                 | 0.001  |
| White                                                                             | 58.0%                                       | 42%                                                  | 1                                                 |                 | 1                                               |        |
| Ethnic minority group                                                             | 43.5%                                       | 56.5%                                                | <b>0.56 (0.50-0.62)</b>                           |                 | <b>0.75 (0.66-0.86)</b>                         |        |
| Missing                                                                           | 54.5%                                       | 45.5%                                                | 0.88 (0.77-1.01)                                  |                 | 1.08 (0.94-1.24)                                |        |

**Notes:**

- RT – Radiotherapy; RP -Radical prostatectomy
- Travel time – represents the difference in travel time between the patients nearest RP and RT centre.
- An Odds Ratio (OR) > 1 means that the chance of receiving RT is higher than when RT and RP are both offered in the nearest hospital.
- Statistically significant results in bold font

**Appendix Table 2.** Table of the odds ratios for the interactions between age; comorbidity; ethnicity; and socioeconomic status on the association between the relative proximity of radiotherapy and surgical services to a patients residence on the choice of treatment modality.

|                                                                                   | Odds Ratio                             |               | Odds Ratio                              |               | LR Test          |
|-----------------------------------------------------------------------------------|----------------------------------------|---------------|-----------------------------------------|---------------|------------------|
|                                                                                   | n=16424                                |               | 95% CI                                  |               | P values         |
| <b>Treatment options available at nearest centre</b>                              | <b>Older men</b>                       |               | <b>Younger men</b>                      |               | <b>&lt;0.001</b> |
| Both RT and RP                                                                    | 1                                      |               | 1                                       |               |                  |
| Only RT available and nearest centre offering RP >15 mins extra travel time away  | 1.54                                   | 1.17-2.00     | 1.13                                    | 0.98-1.31     |                  |
| Only RT available and nearest centre offering RP <15 mins extra travel time away  | 1.05                                   | 0.89-1.25     | 0.83                                    | 0.75-0.92     |                  |
| Only RP available and nearest centre offering RT < 15 mins extra travel time away | 0.89                                   | 0.74-1.07     | 0.91                                    | 0.81-1.00     |                  |
| Only RP available and nearest centre offering RT >15 mins extra travel time away  | 0.98                                   | 0.69-1.39     | 0.62                                    | 0.49-0.78     |                  |
| <b>Treatment options available at nearest centre</b>                              | <b>With comorbidity</b>                |               | <b>No Comorbidity</b>                   |               | <b>0.167</b>     |
| Both RT and RP                                                                    | 1                                      |               | 1                                       |               |                  |
| Only RT available and nearest centre offering RP >15 mins extra travel time away  | 1.49                                   | 1.09-2.05     | 1.18                                    | 1.02-1.36     |                  |
| Only RT available and nearest centre offering RP <15 mins extra travel time away  | 1.06                                   | 0.84-1.33     | 0.88                                    | 0.80-0.98     |                  |
| Only RP available and nearest centre offering RT < 15 mins extra travel time away | 0.91                                   | 0.72-1.15     | 0.95                                    | 0.85-1.06     |                  |
| Only RP available and nearest centre offering RT >15 mins extra travel time away  | 0.79                                   | 0.51-1.22     | 0.71                                    | 0.58-0.88     |                  |
| <b>Treatment options available at nearest centre</b>                              | <b>Most socioeconomically deprived</b> | <b>95% CI</b> | <b>Least socioeconomically deprived</b> | <b>95% CI</b> | <b>0.01</b>      |
| Both RT and RP                                                                    | 1                                      |               | 1                                       |               |                  |
| Only RT available and nearest centre offering RP >15 mins extra travel time away  | 1.26                                   | 0.98-1.62     | 1.22                                    | 1.04-1.41     |                  |
| Only RT available and nearest centre offering RP                                  | 0.72                                   | 0.61-0.85     | 0.99                                    | 0.90-1.11     |                  |

|                                                                                   |                              |           |              |           |                  |
|-----------------------------------------------------------------------------------|------------------------------|-----------|--------------|-----------|------------------|
| <15 mins extra travel time away                                                   |                              |           |              |           |                  |
| Only RP available and nearest centre offering RT < 15 mins extra travel time away | 0.96                         | 0.81-1.14 | 0.92         | 0.82-1.04 |                  |
| Only RP available and nearest centre offering RT >15 mins extra travel time away  | 0.86                         | 0.59-1.25 | 0.68         | 0.55-0.85 |                  |
| <b>Treatment options available at nearest centre</b>                              | <b>Ethnic minority group</b> |           | <b>White</b> |           | <b>&lt;0.001</b> |
| Both RT and RP                                                                    | 1                            |           | 1            |           |                  |
| Only RT available and nearest centre offering RP >15 mins extra travel time away  | 1.43                         | 0.99-2.08 | 1.21         | 1.05-1.39 |                  |
| Only RT available and nearest centre offering RP <15 mins extra travel time away  | 0.61                         | 0.49-0.77 | 0.98         | 0.89-1.06 |                  |
| Only RP available and nearest centre offering RT < 15 mins extra travel time away | 0.77                         | 0.59-1.01 | 0.97         | 0.88-1.08 |                  |
| Only RP available and nearest centre offering RT >15 mins extra travel time away  | 0.92                         | 0.52-1.63 | 0.71         | 0.58-0.87 |                  |

**Notes:**

RT – Radiotherapy; RP - Radical prostatectomy

Younger men defined as age ≤70. Older Men age >70.

Most deprived – men living in areas of highest social deprivation (IMD score 3-5). Least deprived – men living in areas of lowest social deprivation (IMD 1-2).

Travel time – represents the difference in travel time between the patients nearest RP and RT centre.

An Odds Ratio (OR) > 1 means that the chance of receiving RT is higher than when RT and RP are both offered at the nearest hospital.
